# Supplementary material for: Novel comparison of evaluation metrics for gene ontology classifiers reveals drastic performance differences
Source: PubMed Central journal article supplement (PMC6855565; doi:10.1371/journal.pcbi.1007419), 2019-11-04
Supplement: pcbi.1007419.s008.pdf [file pcbi.1007419.s008.pdf]

| Type                  | Abbreviation         | Core function                | Data summary | Thresh. function | IC weight | SemSim. Sum. | Popular | Neg. Ctrl | Novel | Simple EvM |
|-----------------------|----------------------|------------------------------|--------------|------------------|-----------|--------------|---------|-----------|-------|------------|
| AUC metrics           | US AUC               | Area Under ROC Curve         | Unstructured | -                | -         | -            |         | +         |       | +          |
|                       | GC AUC               | Area Under ROC Curve         | Gene-Centric | -                | -         | -            |         |           |       |            |
|                       | TC AUC               | Area Under ROC Curve         | Term-Centric | -                | -         | -            | +       |           |       |            |
|                       | US AUCPR             | Area Under Prec-Recall Curve | Unstructured | -                | -         | -            | +       |           |       | +          |
|                       | GC AUCPR             | Area Under Prec-Recall Curve | Gene-Centric | -                | -         | -            |         |           |       |            |
|                       | TC AUCPR             | Area Under Prec-Recall Curve | Term-Centric | -                | -         | -            |         |           |       |            |
|                       | Fmax                 | F-metric                     | Gene-Centric | max              | -         | -            | +       |           |       |            |
| group metrics         | US Jacc              | Jaccard                      | Unstructured | max              | -         | -            |         |           |       | +          |
|                       | GC Jacc              | Jaccard                      | Gene-Centric | max              | -         | -            |         |           |       | +          |
|                       | ic Smin1             | Euclidean distance           | Unstructured | max              | IC1       | -            |         |           | +     |            |
|                       | ic Smin2             | Euclidean distance           | Gene-Centric | max              | IC1       | -            |         |           | +     |            |
|                       | ic Smin3 (excluded)  | Euclidean distance           | Unstructured | max              | IC1       | -            |         |           | +     |            |
|                       | ic SimGIC            | Weighted Jaccard             | Gene-Centric | max              | IC1       | -            |         |           | +     |            |
|                       | ic SimGIC2           | Weighted Jaccard             | Unstructured | max              | IC1       | -            |         |           | +     |            |
|                       | ic2 Smin1            | Euclidean distance           | Unstructured | max              | IC2       | -            | +       |           | +     |            |
|                       | ic2 Smin2            | Euclidean distance           | Gene-Centric | max              | IC2       | -            |         |           | +     |            |
|                       | ic2 Smin3 (excluded) | Euclidean distance           | Gene-Centric | max              | IC2       | -            |         |           | +     |            |
|                       | ic2 SimGIC           | Weighted Jaccard             | Gene-Centric | max              | IC2       | -            |         |           | +     |            |
|                       | ic2 SimGIC2          | Weighted Jaccard             | Unstructured | max              | IC2       | -            |         |           | +     |            |
| Semantic Similarities | Resnik score A       | Resnik semantics             | Gene-Centric | max              | IC1       | A            |         |           |       |            |
|                       | Resnik score B       | Resnik semantics             | Gene-Centric | max              | IC1       | B            |         | +         |       |            |
|                       | Resnik score C       | Resnik semantics             | Gene-Centric | max              | IC1       | C            |         | +         |       |            |
|                       | Resnik score D       | Resnik semantics             | Gene-Centric | max              | IC1       | D            |         |           |       |            |
|                       | Resnik score E       | Resnik semantics             | Gene-Centric | max              | IC1       | E            |         |           | +     |            |
|                       | Resnik score F       | Resnik semantics             | Gene-Centric | max              | IC1       | F            |         |           | +     |            |
|                       | Lin score A          | Lin semantics                | Gene-Centric | max              | IC1       | A            |         |           |       |            |
|                       | Lin score B          | Lin semantics                | Gene-Centric | max              | IC1       | B            |         | +         |       |            |
|                       | Lin score C          | Lin semantics                | Gene-Centric | max              | IC1       | C            |         | +         |       |            |
|                       | Lin score D          | Lin semantics                | Gene-Centric | max              | IC1       | D            |         |           |       |            |
|                       | Lin score E          | Lin semantics                | Gene-Centric | max              | IC1       | E            |         |           | +     |            |
|                       | Lin score F          | Lin semantics                | Gene-Centric | max              | IC1       | F            |         |           | +     |            |
|                       | AJacc score A        | Jaccard semantics            | Gene-Centric | max              | -         | A            |         |           |       |            |
|                       | AJacc score B        | Jaccard semantics            | Gene-Centric | max              | -         | B            |         | +         |       |            |
|                       | AJacc score C        | Jaccard semantics            | Gene-Centric | max              | -         | C            |         | +         |       |            |
|                       | AJacc score D        | Jaccard semantics            | Gene-Centric | max              | -         | D            |         |           |       |            |
|                       | AJacc score E        | Jaccard semantics            | Gene-Centric | max              | -         | E            |         |           | +     |            |
|                       | AJacc score F        | Jaccard semantics            | Gene-Centric | max              | -         | F            |         |           | +     |            |
