# Supplementary material for: Novel comparison of evaluation metrics for gene ontology classifiers reveals drastic performance differences
Source: PubMed Central journal article supplement (PMC6855565; doi:10.1371/journal.pcbi.1007419), 2019-11-04
Supplement: pcbi.1007419.s009.pdf [file pcbi.1007419.s009.pdf]

A

|                  | Compared parameters |         | Correlation |          |
|------------------|---------------------|---------|-------------|----------|
|                  | 1st K               | 2nd K   | Pearson     | rank     |
| RC.uniprot.1000  | 2                   | 3       | 0.998587    | 0.997759 |
| RC.cafa2012      | 2                   | 3       | 0.997951    | 0.998599 |
| RC.mouseFunc     | 2                   | 3       | 0.998517    | 0.998319 |
| RC.uniprot.1000  | 2                   | 4       | 0.994401    | 0.996639 |
| RC.cafa2012      | 2                   | 4       | 0.994472    | 0.996919 |
| RC.mouseFunc     | 2                   | 4       | 0.995352    | 0.996078 |
| FPS.uniprot.1000 | 2                   | 3       | 0.999746    | 1        |
| FPS.cafa2012     | 2                   | 3       | 0.99971     | 0.999368 |
| FPS.mouseFunc    | 2                   | 3       | 0.9999      | 0.997467 |
| FPS.uniprot.1000 | 2                   | 4       | 0.999633    | 0.999507 |
| FPS.cafa2012     | 2                   | 4       | 0.999105    | 0.999438 |
| FPS.mouseFunc    | 2                   | 4       | 0.999765    | 0.993526 |
|                  |                     | Minimum | 0.994401    | 0.993526 |
|                  |                     | Maximum | 0.9999      | 1        |

Comparison of results when K parameter is varied

Comparison is done by calculating correlation between two sets of results

RC and FPS results are evaluated separately

B

|                  | Compared parameters |              | correlation |          |
|------------------|---------------------|--------------|-------------|----------|
|                  | jacc limit 1        | Jacc limit 2 | Pearson     | Rank     |
| RC.uniprot.1000  | 0.2                 | 0.8          | 0.99985     | 0.99972  |
| RC.cafa2012      | 0.2                 | 0.8          | 0.999907    | 0.998599 |
| RC.mouseFunc     | 0.2                 | 0.8          | 0.999198    | 0.998319 |
| FPS.uniprot.1000 | 0.2                 | 0.8          | 0.999664    | 0.99698  |
| FPS.cafa2012     | 0.2                 | 0.8          | 0.999696    | 0.994526 |
| FPS.mouseFunc    | 0.2                 | 0.8          | 0.999608    | 0.997748 |
|                  |                     | Minimum      | 0.999198    | 0.994526 |
|                  |                     | Maximum      | 0.999907    | 0.99972  |

Comparison of results when jacc-threshold in noise generation is varied

Comparison is done by calculating correlation between two sets of results

RC and FPS results are evaluated separately
